# Supplementary material for: Adherence to the Mediterranean Diet Is Inversely Associated with the Prevalence of Metabolic Syndrome in Older People from the North of Spain
Source: MDPI journal article supplement (doi:10.3390/nu14214536), 2022-10-28
Supplement: s1 [file s1]

## Supplementary Materials

**Table S1.** Adherence to the Mediterranean Diet and the components of the MEDAS-14 questionnaire by gender

|                                                                                                                                                                      | Men<br>(N=103) | Women<br>(N=161) |                | Total<br>(N=264) |
|----------------------------------------------------------------------------------------------------------------------------------------------------------------------|----------------|------------------|----------------|------------------|
|                                                                                                                                                                      | n (%)          | n (%)            | p <sup>1</sup> | n (%)            |
| <b>Adherence to MedDiet (4 levels)</b>                                                                                                                               |                |                  |                |                  |
| High (12-14)                                                                                                                                                         | 2 (1.9)        | 3 (1.9)          |                | 5 (1.9)          |
| Medium (8-11)                                                                                                                                                        | 54 (52.4)      | 92 (57.1)        | 0.874          | 146 (55.3)       |
| Low (5-7)                                                                                                                                                            | 41 (39.8)      | 59 (36.6)        |                | 100 (37.9)       |
| Very low (<5)                                                                                                                                                        | 6 (5.8)        | 7 (4.3)          |                | 13 (4.9)         |
| <b>Adherence to MedDiet (2 levels)</b>                                                                                                                               |                |                  |                |                  |
| Good (≥ 9)                                                                                                                                                           | 35 (34.0)      | 61 (37.9)        | 0.520          | 96 (36.4)        |
| Low (≤ 8)                                                                                                                                                            | 68 (66.0)      | 100 (62.1)       |                | 168 (63.6)       |
| <b>Adherence to MedDiet (MEDAS-14 Questionnaire)</b>                                                                                                                 |                |                  |                |                  |
| 1-Use olive oil as the main source of cooking fat?                                                                                                                   | 101 (98.1)     | 158 (98.1)       | 0.964          | 259 (98.1)       |
| 2- Do you consume 4 or more tablespoons of oil daily (including oil used frying, dressing or meals away from home, etc.?)                                            | 42 (40.8)      | 63 (39.1)        | 0.790          | 105 (39.8)       |
| 3-Do you consume 2 or more servings of vegetables per day? Count side and half portions as ½ point; a full portion is 200g.                                          | 11 (10.7)      | 34 (21.1)        | 0.028          | 45 (17.0)        |
| 4-Do you eat 3 or more pieces of fruit (including freshly squeezed juice) per day?                                                                                   | 57 (55.3)      | 99 (61.5)        | 0.321          | 156 (59.1)       |
| 5-Do you eat less than 1 serving per day of red meat, hamburgers or sausages? One portion: 100-150g.                                                                 | 94 (91.3)      | 153 (95.0)       | 0.224          | 247 (93.6)       |
| 6-Do you consume less than 1 serving (12g.) of butter, margarine or cream per day?                                                                                   | 88 (85.4)      | 137 (85.1)       | 0.939          | 225 (85.2)       |
| 7-Do you consume less than 1 serving of carbonated and/or sweetened beverages per day?                                                                               | 89 (86.4)      | 141 (87.6)       | 0.782          | 230 (87.1)       |
| 8- Do you drink wine? Do you drink 7 or more glasses (100ml) per week?                                                                                               | 42 (40.8)      | 42 (26.1)        | 0.012          | 84 (31.8)        |
| 9-Do you consume 3 or more servings (150g.) of legumes per week?                                                                                                     | 42 (40.8)      | 53 (32.9)        | 0.194          | 95 (36.0)        |
| 10- Do you consume 3 or more portions of fish/seafood per week (100-150g. of fish, 4-5 pieces or 200. of seafood)?                                                   | 52 (50.5)      | 81 (50.3)        | 0.978          | 133 (50.4)       |
| 11- Do you consume less than 2 servings per week of industrial (not homemade) confectionery such as biscuits and cakes?                                              | 50 (48.5)      | 89 (55.3)        | 0.285          | 139 (52.7)       |
| 12- Do you eat 3 or more times a week nuts (1 portion: 30g.)                                                                                                         | 38 (36.9)      | 68 (42.2)        | 0.388          | 106 (40.2)       |
| 13- Do you prefer to eat chicken, turkey, rabbit instead of beef, pork, hamburgers or sausages?                                                                      | 48 (46.6)      | 106 (65.8)       | 0.002          | 154 (58.3)       |
| 14- Do you eat 2 or more times a week cooked vegetables, pasta, rice or other foods with sofrito (tomato sauce, simmered with olive oil, garlic, onion and /or leek? | 25 (24.3)      | 30 (18.6)        | 0.271          | 55 (20.8)        |

<sup>1</sup>Pearson's chi-square

**Table S2.** Sociodemographic and health-related variables by gender

|                                 | <b>Men<br/>(N = 103)</b> | <b>Women<br/>(N = 161)</b> | <b>p-value</b> | <b>Total<br/>(N = 264)</b> |
|---------------------------------|--------------------------|----------------------------|----------------|----------------------------|
|                                 | <b>N (%)</b>             | <b>N (%)</b>               |                | <b>N (%)</b>               |
| <b>Age groups</b>               |                          |                            | 0.833*         |                            |
| 65-69                           | 36 (34.9)                | 52 (32.3)                  |                | 88 (33.3)                  |
| 70-74                           | 36 (34.9)                | 62 (38.5)                  |                | 98 (37.1)                  |
| 75-79                           | 31 (30.2)                | 47 (29.2)                  |                | 78 (29.6)                  |
| <b>Marital status</b>           |                          |                            |                |                            |
| Married/partnered               | 79 (76.7)                | 88 (54.7)                  | <0.001*        | 167 (63.2)                 |
| Separated                       | 7 (6.8)                  | 9 (5.6)                    |                | 16 (6.1)                   |
| Widowed                         | 7 (6.8)                  | 41 (25.4)                  |                | 48 (18.2)                  |
| Single                          | 10 (9.7)                 | 23 (14.3)                  |                | 33 (12.5)                  |
| <b>Type of cohabitation</b>     |                          |                            |                |                            |
| Couple                          | 80 (77.7)                | 84 (52.2)                  | =0.001*        | 164 (62.1)                 |
| With relatives                  | 5 (4.8)                  | 24 (14.9)                  |                | 29 (11.0)                  |
| With a carer                    | 1 (1.0)                  | 2 (1.2)                    |                | 3 (1.1)                    |
| Alone                           | 17 (16.5)                | 50 (31.1)                  |                | 67 (25.4)                  |
| Shared flat                     | 0 (0.0)                  | 1 (0.6)                    |                | 1 (0.4)                    |
| <b>Educational level</b>        |                          |                            |                |                            |
| University                      | 54 (52.4)                | 53 (32.9)                  | = 0.002*       | 107 (40.5)                 |
| Secondary school                | 28 (27.2)                | 46 (28.6)                  |                | 74 (28.0)                  |
| Primary school                  | 21 (20.4)                | 55 (34.2)                  |                | 76 (28.8)                  |
| Incomplete                      | 0 (0.0)                  | 7 (4.3)                    |                | 7 (2.7)                    |
| <b>Who cooks</b>                |                          |                            |                |                            |
| Partaker                        | 23 (22.4)                | 140 (86.9)                 | <0.001*        | 163 (61.7)                 |
| The couple                      | 56 (54.4)                | 3 (1.9)                    |                | 59 (22.3)                  |
| Relatives                       | 20 (19.4)                | 15 (9.3)                   |                | 35 (13.3)                  |
| Carer                           | 2 (1.9)                  | 3 (1.9)                    |                | 5 (1.9)                    |
| Catering                        | 2 (1.9)                  | 0 (0.0)                    |                | 2 (0.8)                    |
| <b>BMI categories</b>           |                          |                            | 0.001*         |                            |
| Normal weight                   | 13 (12.6)                | 51 (31.7)                  | <0.001**       | 64 (24.2)                  |
| Overweight                      | 62 (60.2)                | 70 (43.5)                  | 0.008**        | 132 (50.0)                 |
| Obesity                         | 28 (27.2)                | 40 (24.8)                  | 0.664**        | 68 (25.8)                  |
| <b>Abdominal obesity</b>        | 80 (77.7)                | 128 (79.5)                 | 0.722*         | 208 (78.8)                 |
| <b>Health status</b>            |                          |                            |                |                            |
| Hypertension                    | 89 (86.4)                | 121 (75.2)                 | 0.027**        | 210 (79.5)                 |
| Hyperglycaemia                  | 47 (45.6)                | 37 (23.0)                  | <0.001**       | 84 (31.8)                  |
| Hipertriglyceridemia            | 21 (20.4)                | 38 (23.6)                  | 0.541**        | 59 (22.3)                  |
| Low-HDL                         | 21 (20.4)                | 31 (19.3)                  | 0.821**        | 52 (19.7)                  |
| <b>Number of variables MetS</b> |                          |                            | <0.001*        |                            |
| none                            | 6 (5.8)                  | 32 (19.9)                  | 0.002**        | 38 (14.4)                  |
| 1                               | 28 (27.2)                | 74 (46.0)                  | 0.002**        | 102 (38.6)                 |
| 2                               | 37 (35.9)                | 36 (22.4)                  | 0.017**        | 73 (27.6)                  |
| 3                               | 23 (22.3)                | 17 (10.6)                  | <0.001**       | 40 (15.2)                  |
| 4                               | 9 (8.7)                  | 2 (1.2)                    | 0.01**         | 11 (4.2)                   |
| <b>Metabolic syndrome</b>       | 49 (47.6)                | 57 (35.4)                  | 0.049*         | 106 (40.2)                 |

\*Pearson Chi-square test

\*\*Pearson Chi square Goodness-of-Fit test
